# Supplementary material for: Ecological Consequences of Sediment on High-Energy Coral Reefs
Source: PubMed Central journal article supplement (PMC3790735; doi:10.1371/journal.pone.0077737), 2013-10-04
Supplement: pone.0077737.s002.pdf [file pone.0077737.s002.pdf]

**Table S2:** 2-way ANOVA of T<sub>7</sub> turf length data (square root  $x + 21.0633$  transformed data, sites pooled)

|                 | SS      | df | MS     | <i>F</i> | <i>P</i> |
|-----------------|---------|----|--------|----------|----------|
| Cage            | 82.595  | 2  | 41.298 | 6.309    | 0.005    |
| Sediment        | 16.180  | 1  | 16.180 | 2.472    | 0.126    |
| Cage × Sediment | 12.300  | 2  | 6.150  | 0.940    | 0.402    |
| Error           | 196.368 | 30 | 6.546  |          |          |
